# Supplementary material
Source: PubMed Central journal article supplement (PMC5707143)
Supplement: jci-127-90699-s001.pdf [file jci-127-90699-s001.pdf]

## **SUPPLEMENTAL DATA**

### **A significant role for tumor necrosis factor in *Nlrp3* inflammasomopathies**

Matthew D. McGeough, Alexander Wree, Maria E. Inzaugarat, Ariela Haimovich, Casey D. Johnson, Carla A. Peña, Raphaela Goldbach-Mansky, Lori Broderick, Ariel E. Feldstein, and  
Hal M. Hoffman

**Supplemental Table 1. Sequences of primers used for quantitative PCR**

| Gene             | Species | Sequence                                                                           |
|------------------|---------|------------------------------------------------------------------------------------|
| Arg1             | mouse   | FWD 5'-CTC CAA GCC AAA GTC CTT AGA G-3'<br>REV 5'-AGG AGC TGT CAT TAG GGA CAT C-3' |
| ASC              | mouse   | FWD 5'-CTT GTC AGG GGATGA ACT CAA AA-3<br>REV 5'-GCC ATA CGA CTC CAG ATA GTA GC-3' |
| pro-Caspase 1    | mouse   | FWD 5'-ACA AGG CAC GGG ACC TAT G-3'<br>REV 5'-TCC CAG TCA GTC CTG GAA ATG-3'       |
| CXCL1            | mouse   | FWD 5'-CTG GGA TTC ACC TCA AGA ACA TC-3'<br>REV 5'- CAG GGT CAA GGC AAG CCT C-3'   |
| CXCL2            | mouse   | FWD 5'-CCA ACC ACC AGG CTA CAG G-3'<br>REV 5'- GCG TCA CAC TCA AGC TCT G-3'        |
| F4/80            | mouse   | FWD 5'-TGA CTC ACC TTG TGG TCC TAA-3'<br>REV 5'-CTT CCC AGA ATC CAG TCT TTC C-3'   |
| iNOS             | mouse   | FWD 5'-GTT CTC AGC CCA ACA ATA CAA GA-3'<br>REV 5'-GTG GAC GGG TCG ATG TCA C-3'    |
| Ly6c             | mouse   | FWD 5'-GCA GTG CTA CGA GTG CTA TGG-3'<br>REV 5'-ACT GAC GGG TCT TTA GTT TCC TT-3'  |
| MPO              | mouse   | FWD 5'-AGT TGT GCT GAG CTG TAT GGA-3'<br>REV 5'-CGG CTG CTT GAA GTA AAA CAG G-3'   |
| NLRP3            | mouse   | FWD 5'- ATT ACC CGC CCG AGA AAG G-3'<br>REV 5'- TCG CAG CAA AGA TCC ACA CAG-3'     |
| pro-IL-1 $\beta$ | mouse   | FWD 5'-GAA ATG CCA CCT TTT GAC AGT G-3'<br>REV 5'-CTG GAT GCT CTC ATC AGG ACA-3'   |
| pro-IL-18        | human   | FWD 5'-TCT TCA TTG ACC AAG GAA ATC GG-3'<br>REV 5'-TCC GGG GTG CAT TAT CTC TAC-3'  |

**Supplemental Table 2. NOMID patient characteristics and clinical symptoms**

| # | Visit     | Age (yrs) | M / F | Race           | Remission | CRP (mg/dl) | Joint disease                          | Eye disease                          | Hearing loss  | Developmental delay | Aseptic Meningitis |
|---|-----------|-----------|-------|----------------|-----------|-------------|----------------------------------------|--------------------------------------|---------------|---------------------|--------------------|
| 1 | Baseline  | 3.4       | M     | Asian          | n/a       | 7.24        | No                                     | Conjunctivitis                       | Mild          | No                  | Yes                |
|   | Follow-up | 6.4       |       |                | Yes       | 0.11        |                                        |                                      |               |                     |                    |
| 2 | Baseline  | 1.8       | M     | Caucasian      | n/a       | 5.62        | Patellar overgrowth, mild contractures | Conjunctivitis                       | No            | No                  | Yes                |
|   | Follow-up | 5.2       |       |                | Yes       | 0.03        |                                        |                                      |               |                     |                    |
| 3 | Baseline  | 7.0       | F     | Caucasian      | n/a       | 3.90        | No                                     | Conjunctivitis                       | Mild-moderate | No                  | Yes                |
|   | Follow-up | 8.5       |       |                | Yes       | 0.44        |                                        |                                      |               |                     |                    |
| 4 | Baseline  | 5.6       | M     | Asian          | n/a       | 3.19        | Bony overgrowth                        | Conjunctivitis                       | Severe        | No                  | Yes                |
|   | Follow-up | 9.7       |       |                | Yes       | 1.66        |                                        |                                      |               |                     |                    |
| 5 | Baseline  | 15.9      | F     | Hispanic/White | n/a       | 4.81        | Patellar overgrowth                    | Conjunctivitis blindness             | Severe        | Yes (s/p stroke)    | Yes                |
|   | Follow-up | 16.4      |       |                | No        | 2.32        |                                        |                                      |               |                     |                    |
| 6 | Baseline  | 8.5       | M     | Hispanic/White | n/a       | 4.90        | No                                     | Conjunctivitis h/o transient uveitis | Severe        | No                  | Yes                |
|   | Follow-up | 16.1      |       |                | Yes       | 0.27        |                                        |                                      |               |                     |                    |

*n/a, not applicable*

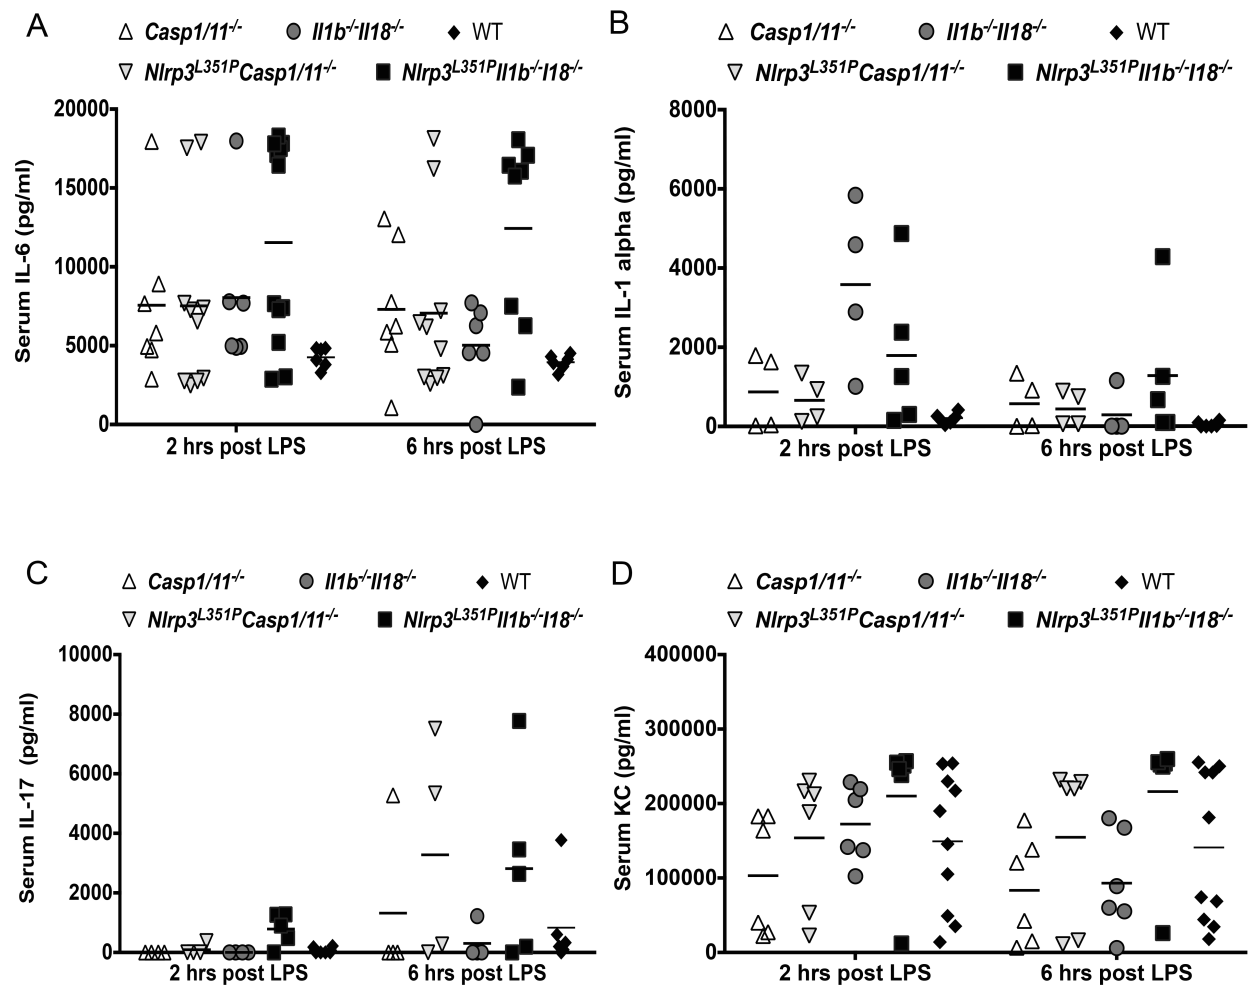

**Supplemental Figure 1. Pro-inflammatory cytokines are not significantly elevated in *Nlrp3*<sup>L351P</sup> *Il1b*<sup>-/-</sup> *Il18*<sup>-/-</sup> mice following stimulation with LPS.** Serum IL-6 (A), IL-1 alpha (B), IL-17 (C) and KC (D) showed no significant differences in *Nlrp3*<sup>L351P</sup> *Il1b*<sup>-/-</sup> *Il18*<sup>-/-</sup> mice at both 2 and 6 hours post LPS (5  $\mu$ g/g) as compared to *Nlrp3*<sup>L351P</sup> *Casp1/11*<sup>-/-</sup> mice. Each point is representative of an individual mouse, mean is represented by horizontal bar. Kruskal-Wallis test and Dunn's Multiple Comparison Test was used to determine statistical significance. Data represent mean  $\pm$  SEM.

A

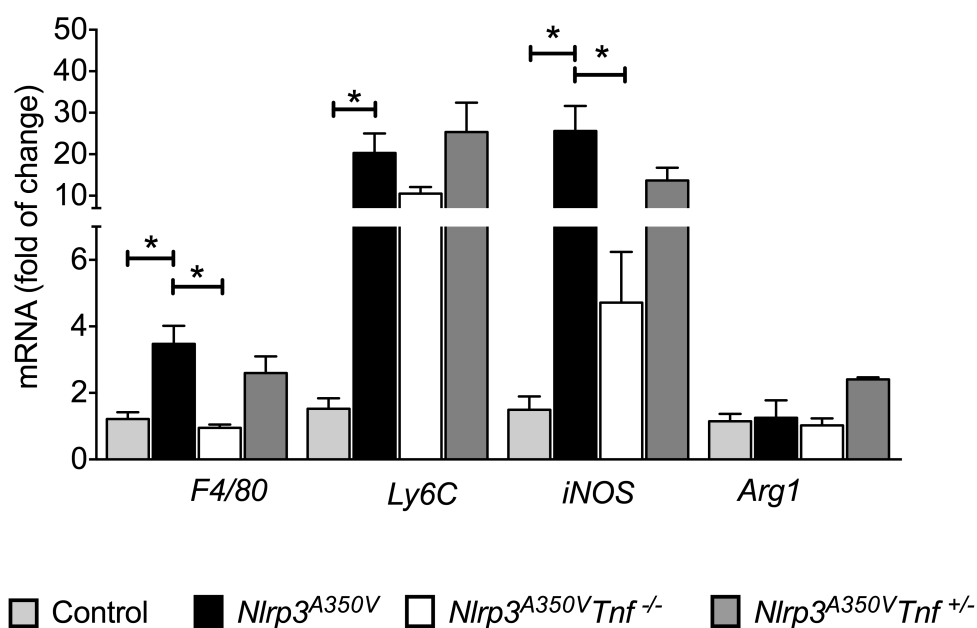

B

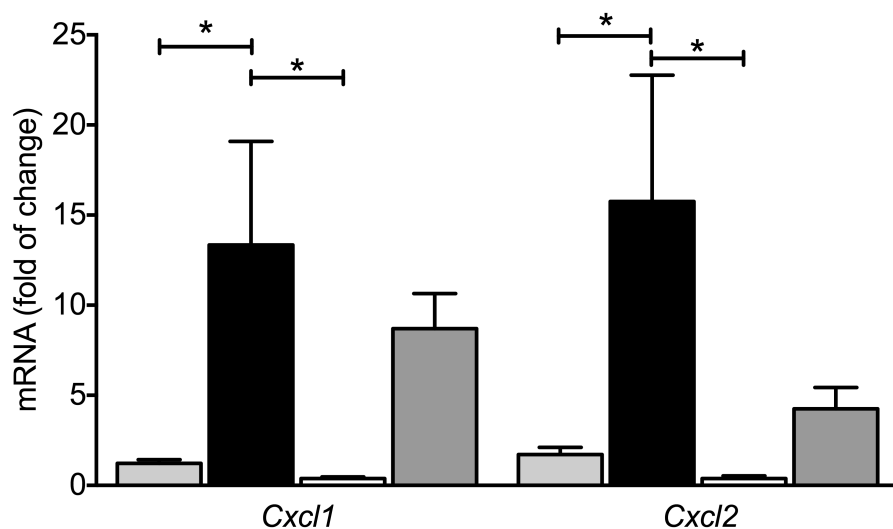

**Supplemental Figure 2. Knockout of TNF reduces mRNA expression of inflammatory macrophages and neutrophil markers in skin.** Expression of *F4/80* and *iNos* was significantly raised in *Nlrp3*<sup>A350V</sup> mice as compared to littermate controls and was attenuated in *Nlrp3*<sup>A350V</sup> *Tnf*<sup>-/-</sup> mice, while a similar trend was seen for *Ly6c*. No significant differences were seen in expression of *Arg1* (A). *Cxcl1* and *Cxcl2* expression is similarly elevated in *Nlrp3*<sup>A350V</sup> mice and significantly reduced in *Nlrp3*<sup>A350V</sup> *Tnf*<sup>-/-</sup> animals (B) (n=12 for control, *Nlrp3*<sup>A350V</sup> and *Nlrp3*<sup>A350V</sup> *Tnf*<sup>-/-</sup> mice and n=8 for *Nlrp3*<sup>A350V</sup> *Tnf*<sup>+/-</sup> and *Tnf*<sup>-/-</sup> animals for each marker). Kruskal-Wallis test and Dunn's Multiple Comparison Test was used to determine statistical significance. Data represent mean ± SEM.

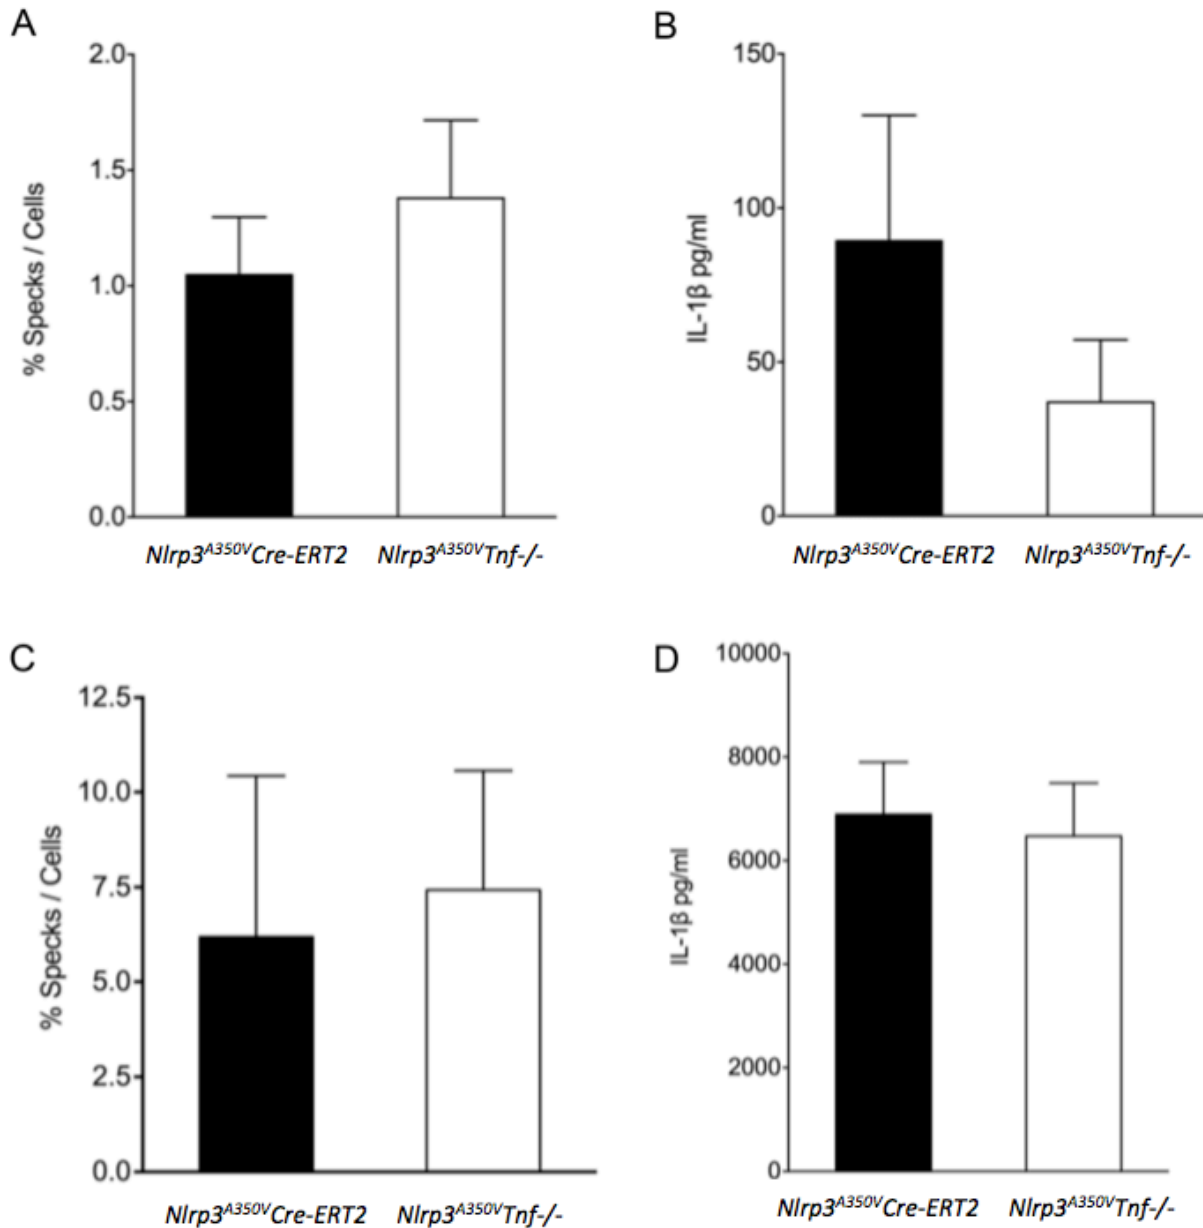

**Supplemental Figure 3. No significant differences in ASC specking or mature IL-1 $\beta$  with or without addition of LPS comparing *Nlrp3<sup>A350V</sup>CreT* and *Nlrp3<sup>A350V</sup>Tnf<sup>-/-</sup>* BMDCs.** Inflammasome activation, quantified by ASC specking revealed no significant difference in the percentage of ASC specks/nuclei in *Nlrp3<sup>A350V</sup>Tnf<sup>-/-</sup>* and *Nlrp3<sup>A350V</sup>CreT* cells (A) (n=3 mice per group with 6 images taken per well at 10X magnification). Mature IL-1 $\beta$  was not significantly reduced in supernatants from *Nlrp3<sup>A350V</sup>Tnf<sup>-/-</sup>* and *Nlrp3<sup>A350V</sup>CreT* cells (B) (n=8 mice per group). Likewise, addition of 1ng/ml LPS revealed no significant difference in the percentage of ASC specks/nuclei (C) (n=3 mice per group with 6 images taken per well at 10X magnification). IL-1 $\beta$  had similar values in supernatants from *Nlrp3<sup>A350V</sup>Tnf<sup>-/-</sup>* and *Nlrp3<sup>A350V</sup>CreT* cells (D) (n=8 mice per group). Student's unpaired t-test (2 tailed) was utilized for statistical analysis. Data represent mean  $\pm$  SEM.

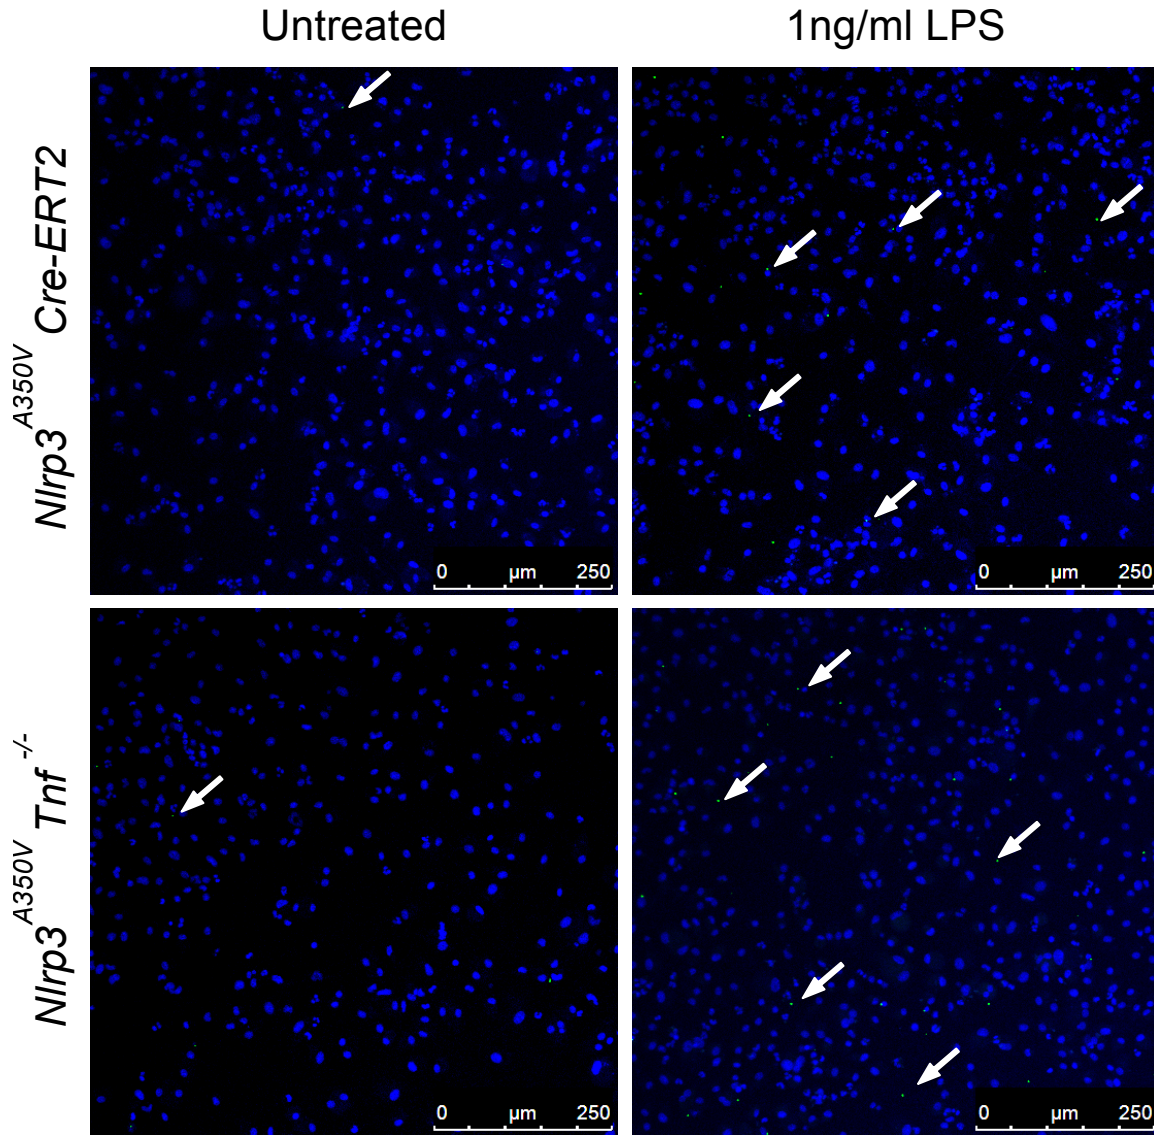

**Supplemental Figure 4. Visualization of ASC specks in BMDC's from *Nlrp3<sup>A350V</sup> CreT* and *Nlrp3<sup>A350V</sup> Tnf<sup>-/-</sup>* cells.** ASC specks were stained and represented as green specks as indicated by the white arrows above. Stimulation with LPS (1ng/ml) similarly increased the number of ASC specks in *Nlrp3<sup>A350V</sup> CreT* and *Nlrp3<sup>A350V</sup> Tnf<sup>-/-</sup>* cells. Images are representative of three mice per group with 6 images taken per well at 10x magnification. Scale bar represents length of 250μm.
